# Supplementary material for: Genetics re-establish the utility of 2-methylhopanes as cyanobacterial biomarkers before 750 million years ago
Source: Research Square preprint supplement (doi:10.21203/rs.3.rs-2202848/v1), 2022-11-07
Supplement: Supplementary file 1 [file 9e6619fead97f11740509c18.xlsx]

## Sheet: Table S1
SC and HpnP distribution in Rokubacteria
Species	SC	HpnP	Assembly level
Candidatus Rokubacteria bacterium 13_1_20CM_4_68_9	OLE01120	OLD96052	Scaffold
Candidatus Rokubacteria bacterium 13_1_40CM_68_15	OLB98315	OLB99630	Scaffold		ND: Not detected
Candidatus Rokubacteria bacterium 13_1_40CM_69_27	OLC16869	OLC13856	Scaffold
Candidatus Rokubacteria bacterium 13_2_20CM_2_64_8	OLB39525	OLB42862	Scaffold		Accesion numbers are retrieved from NCBI.
Candidatus Rokubacteria bacterium RIFCSPLOWO2_12_FULL_73_47	OGL28014	OGL29552	Scaffold		https://www.ncbi.nlm.nih.gov/protein
Candidatus Rokubacteria bacterium RIFCSPLOWO2_12_FULL_71_22	OGL18913	OGL15523	Scaffold
Candidatus Rokubacteria bacterium RIFCSPLOWO2_02_FULL_72_37	OGL12658	OGL11598	Scaffold
Candidatus Rokubacteria bacterium GWA2_73_35	OGK87033	OGK80032	Scaffold		Boldface & Yellow background indicate the presence of both SC & HpnP in a draft genome
Candidatus Rokubacteria bacterium RIFCSPLOWO2_02_FULL_73_56	OGL11405	OGL07389	Scaffold		Species in purple indicate the presence of only HpnP in their genomes.
Candidatus Rokubacteria bacterium RIFCSPHIGHO2_12_FULL_73_22	OGK99677	OGL00356	Scaffold		Species in grey indicate the absence of both SC and HpnP in their genomes.
Candidatus Rokubacteria bacterium RBG_16_73_20	OGK93598	OGK91554	Scaffold
NC_groundwater_303_Ag_B-0.1um_71_19	MBI2218193	MBI2216988	Scaffold		Short' labelling indicates that the annotated protein sequence is shorter than the typical length of other proteins in the phylum.
NC_groundwater_293_Ag_S-0.65um_70_13	MBI2206593	MBI2203537	Scaffold
NC_groundwater_747_Ag_S-0.65um_70_10	MBI3107659	MBI3108248	Scaffold
NC_groundwater_446_Ag_B-0.1um_72_16	MBI2491611	MBI2493946	Scaffold
NC_groundwater_130_Ag_B-0.1um_72_7	MBI2015198	MBI2014048	Scaffold
NC_groundwater_4_Ag_B-0.1um_71_87	MBI1735299	MBI1735275	Contig
NC_groundwater_294_Ag_S-0.65um_70_18	MBI2197275	MBI2199356	Contig
NC_groundwater_1479_Ag_S-0.65um_71_44	MBI4638057	MBI4636724	Contig
NC_groundwater_1480_Ag_S-0.65um_71_62	MBI4592781	MBI4593300	Contig
NC_groundwater_90_Ag_B-0.1um_72_48	MBI1962251	MBI1962621	Contig
NC_groundwater_89_Ag_B-0.1um_70_49	MBI1957635	MBI1959664 short	Contig
NC_groundwater_3_Ag_B-0.1um_69_29	MBI1728293 short	MBI1727008	Contig
NC_groundwater_1481_Ag_S-0.65um_72_66	MBI4628412 short	MBI4628085	Contig
SpSt-169	HEJ33485	HEJ33570	Contig
SpSt-345	HEU49781	HEU51966	Contig
SpSt-311	HEV29254	HEV28399	Contig
AR_45	TMQ16693	TMQ17096	Scaffold
AR7	PYM26520	PYM26463	Scaffold
AR17	PYN71102	PYN62749	Scaffold
AR5	PYM28216	PYM21880	Scaffold
AR4	PYM54688	PYM55172	Scaffold
AR29	PYN06901	PYN05623	Scaffold
AR44	PYM39400	PYM38756	Scaffold
AR3	PYN20505	PYN26246	Scaffold
AR19	PYN59485	PYN53359	Scaffold
AR16	PYO00561	PYO03703	Scaffold
AR37	PYM76050	PYM71628	Scaffold
AR35	PYM97383	PYM90223	Scaffold
AR43	PYM49380	PYM52780	Scaffold
AR12	PYO24847	PYO23449	Scaffold
AR40	PYM80576	PYM81698	Scaffold
AR8	PYM19304	PYM16918	Scaffold
AR11	PYO52259	PYO49640	Scaffold
AR33	PYN05984 short	PYN16994	Scaffold
M_DeepCast_50m_m1_133	MBM3220992	MBM3218767	Contig
M_DeepCast_50m_m1_244	MBM4442919	MBM4439336	Contig
metabat2.850	RPH73333 short	RPH84949	Contig
UBA9643	HBH01222	HBH01151 short	Scaffold
UBA12499	HAM55627 HAM56194	HAM55694 short	Scaffold
SpSt-419	ND	HGH11681	Contig
NC_groundwater_1366_Ag_S-0.2um_70_111	ND	MBI4245929	Contig
Candidatus Rokubacteria bacterium 13_1_20CM_2_68_19	ND	OLE42688	Scaffold
Candidatus Rokubacteria bacterium 13_1_40CM_2_68_13	ND	OLD29951	Scaffold
Candidatus Rokubacteria bacterium 13_2_20CM_69_10	ND	OLB10246	Scaffold
B4_bin.10	ND	MBF8287331	Scaffold
Candidatus Rokubacteria bacterium 13_1_20CM_2_69_58	OLE48063	ND	Scaffold
Candidatus Rokubacteria bacterium 13_1_20CM_4_70_14	OLD78756	ND	Scaffold
Candidatus Rokubacteria bacterium 13_1_40CM_2_70_45	OLD24501	ND	Scaffold
Candidatus Rokubacteria bacterium 13_1_40CM_3_69_38	OLC91402	ND	Scaffold
Candidatus Rokubacteria bacterium 13_1_40CM_4_67_11	OLC63937	ND	Scaffold
Candidatus Rokubacteria bacterium 13_1_40CM_4_69_39	OLC56525	ND	Scaffold
Candidatus Rokubacteria bacterium 13_1_40CM_4_69_5	OLC37101	ND	Scaffold
Candidatus Rokubacteria bacterium 13_1_40CM_69_96	OLC08611	ND	Scaffold
Candidatus Rokubacteria bacterium 13_2_20CM_2_70_11	OLB53187	ND	Scaffold
Candidatus Rokubacteria bacterium 13_2_20CM_69_15_1	OLB06209	ND	Scaffold
Candidatus Rokubacteria bacterium RIFCSPLOWO2_02_FULL_68_19	OGL07109	ND	Scaffold
Candidatus Rokubacteria bacterium GWC2_70_24	OGK91365	ND	Scaffold
Candidatus Rokubacteria bacterium RIFCSPLOWO2_12_FULL_71_19	OGL17706	ND	Scaffold
Candidatus Rokubacteria bacterium GWF2_70_14	OGK92480	ND	Scaffold
Candidatus Rokubacteria bacterium GWC2_70_16	OGK82252	ND	Scaffold
Candidatus Rokubacteria bacterium GWA2_70_23	OGK83160	ND	Scaffold
Candidatus Rokubacteria bacterium CSP1-6	KRT74535	ND	Scaffold
Candidatus Rokubacteria bacterium 13_1_20CM_2_70_7	OLE37502 short	ND	Scaffold
Candidatus Rokubacteria bacterium RIFCSPHIGHO2_02_FULL_73_26	OGK96453 short	ND	Scaffold
NC_groundwater_445_Ag_B-0.1um_71_19	MBI2529342	ND	Scaffold
NC_groundwater_716_Ag_S-0.2um_69_13	MBI3030918	ND	Scaffold
NC_groundwater_276_Ag_S-0.2um_68_12	MBI2152776	ND	Scaffold
NC_groundwater_277_Ag_S-0.2um_71_17	MBI2160779	ND	Scaffold
NC_groundwater_278_Ag_S-0.2um_73_13	MBI2156708	ND	Scaffold
NC_groundwater_444_Ag_B-0.1um_68_10	MBI2554186	ND	Scaffold
NC_groundwater_414_Ag_B-0.1um_71_15	MBI2467008	ND	Scaffold
NC_groundwater_67_Pr7_S-0.65um_64_12	MBI1894567	ND	Scaffold
NC_groundwater_468_Ag_B-0.1um_68_6	MBI2544341	ND	Scaffold
NC_groundwater_969_Pr1_S-0.2um_71_15	MBI3629185 short	ND	Scaffold
NC_groundwater_968_Pr1_S-0.2um_70_17	MBI3637602 short	ND	Scaffold
NC_groundwater_1046_Pr1_S-0.65um_71_27	MBI3826638	ND	Contig
NC_groundwater_1367_Ag_S-0.2um_72_125	MBI4269680	ND	Contig
NC_groundwater_1478_Ag_S-0.65um_68_51	MBI4610501	ND	Contig
NC_groundwater_1111_Ag_S2p5_72_177	MBI4012996	ND	Contig
NC_groundwater_1477_Ag_S-0.65um_67_43	MBI4588355	ND	Contig
NC_groundwater_39_Pr7_B-0.1um_72_10	MBI1848275	ND	Contig
NC_groundwater_967_Pr1_S-0.2um_66_23	MBI3625107	ND	Contig
NC_groundwater_1365_Ag_S-0.2um_67_47	MBI4240736	ND	Contig
NC_groundwater_1476_Ag_S-0.65um_67_27	MBI4560712	ND	Contig
NC_groundwater_854_Pr1_B-0.1um_70_14	MBI3456802	ND	Contig
NC_groundwater_1368_Ag_S-0.2um_72_193	MBI4254254 short MBI4255908 short	ND	Contig
NC_groundwater_671_Ag_B-0.1um_70_49	MBI2878922 short	ND	Contig
NC_groundwater_1705_Pr3_B-0.1um_69_6	MBI5628025 short	ND	Contig
AR20	PYN66521	ND	Contig
AR41	PYM50054	ND	Contig
AR23	PYN79975	ND	Scaffold
AR14	PYN85465	ND	Scaffold
AR24	PYN76091	ND	Scaffold
AR28	PYN37365	ND	Scaffold
AR31	PYM92417	ND	Scaffold
AR34	PYM97933	ND	Scaffold
AR39	PYM44018	ND	Scaffold
AR21	PYN51033	ND	Scaffold
AR27	PYN51621	ND	Scaffold
AR18	PYN96722	ND	Scaffold
AR38	PYM65780	ND	Scaffold
AR26	PYN26872	ND	Scaffold
AR25	PYN39059	ND	Scaffold
AR2	PYO05245	ND	Scaffold
AR15	PYO20307	ND	Scaffold
AR42	PYM37099	ND	Scaffold
AR36	PYM80156	ND	Scaffold
AR30	PYM76827	ND	Scaffold
AR10	PYO57005	ND	Scaffold
AR9	PYM06930 short	ND	Scaffold
AR6	PYM56077 short	ND	Scaffold
AR32	PYN15732 short	ND	Scaffold
Candidatus Rokubacteria bacterium 13_1_20CM_4_70_13	ND	ND	Scaffold
Candidatus Rokubacteria bacterium 13_1_20CM_70_15	ND	ND	Scaffold
Candidatus Rokubacteria bacterium 13_1_40CM_2_68_8	ND	ND	Scaffold
Candidatus Rokubacteria bacterium 13_2_20CM_70_12	ND	ND	Scaffold
Candidatus Rokubacteria bacterium 13_2_20CM_69_15_2	ND	ND	Scaffold
Candidatus Rokubacteria bacterium RIFCSPHIGHO2_02_FULL_69_13	ND	ND	Scaffold
Candidatus Rokubacteria bacterium RIFCSPLOWO2_12_FULL_69_21	ND	ND	Scaffold
Candidatus Rokubacteria bacterium RIFCSPLOWO2_02_FULL_71_18	ND	ND	Scaffold
NC_groundwater_413_Ag_B-0.1um_71_11	ND	ND	Scaffold
AR22	ND	ND	Scaffold
AR13	ND	ND	Scaffold
EFPC_24	ND	ND	Contig
AM_2207	ND	ND	Contig
Amazon FNV 2010 15 13	ND	ND	Contig
CR_Sed_300A_bin.94	ND	ND	Contig
CR_Sed_300A_bin.93	ND	ND	Contig
CR_Sed_300A_bin.82	ND	ND	Contig
Total: 140	117	56
Ratio	0.835714	0.4
HpnP/SC		0.478632		HpnP/SC indicates the ratio of HpnP-bearing species among SC-bearing species.

## Sheet: Table S2
Taxonomic distribution of SC and HpnP in Hyphomicrobiales in Alphaproteobacteria
		Number of complete genomes	Complete genome only		Draft genome included
Order	Family (genome available)		SC	HpnP	SC	HpnP
Hyphomicrobiales	Aurantimonadaceae	11	0	0	Y	N
	Bartonellaceae	21	0	0	N	N		Y	Present in draft and/or complete genomes (at least one species)
	Beijerinckiaceae	7	7	7	Y	Y		Y	Present only in draft genomes (at least one species)
	Nitrobacteraceae	51	50	47	Y	Y		N	Absent even in complete/draft genomes
	Brucellaceae	26	0	0	N	N
	Chelatococcaceae	2	0	0	N	N
	Cohaesibacteraceae	0	0	0	N	N
	Hyphomicrobiaceae	9	4	1	Y	Y
	Methylobacteriaceae	24	19	16	Y	Y
	Methylocystaceae	8	7	0	Y	Y
	Notoacmeibacteraceae	0	0	0	N	N
	Phyllobacteriaceae	55	0	0	Y	N
	Rhizobiaceae	104	6	0	Y	Y
	Rhodobiaceae	1	0	0	Y	Y
	Roseiarcaceae	0	0	0	Y	N
	Salinarimonadaceae	0	0	0	Y	N
	Xanthobacteraceae	9	0	0	Y	N
Total	17	328	93	71	12	7
Ratio			0.283537	0.216463	0.705882	0.411765
HpnP/ SC				0.763441		0.583333			HpnP/SC indicates the ratio of HpnP-bearing species among SC-bearing species.
			(Count of species)		(Count of family)				At the family level, HpnP/SC indicates the ratio of families that contain HpnP-bearing species among families that contain SC-bearing species.

## Sheet: Table S3
SC and HpnP distribution in Hyphomicrobiales in Alphaproteobacteria			2-Methylhopanoid biosynthesis		Aerobic cobalamin biosynthesis
Order	Family	Species	SC	HpnP	CobG	CobF	Assembly level
Hyphomicrobiales	Beijerinckiaceae	Methylocella tundrae	VFU08999	VFU10023	VFU08967	VFU09396	Complete		ND: Not detected
		Beijerinckia indica subsp. indica ATCC 9039	ACB96717	ACB95082	ACB97065		Complete
		Methylovirgula ligni	QAY94637	QAY96307	QAY95452	QAY95444	Complete		Accesion numbers are retrieved from NCBI.
		Methylovirgula sp. HY1	QXX75105	QXX74010	QXX76221		Complete		https://www.ncbi.nlm.nih.gov/protein
		Methylocella silvestris BL2	ACK52150	ACK50840		ACK52138	Complete
		Beijerinckiaceae bacterium / MG08	QBR72877	QBR72440	QBR71272		Complete
		Beijerinckiaceae bacterium RH AL1	VVC53255	VVC55031		VVC56735	Complete		Boldface & Green background: SC & HpnP present in a complete genome
		Methyloferula stellata	WP_020177153	WP_020176185	WP_026595391		contig		Boldface & Yellow background: SC & HpnP present in a draft genome
		Methylocapsa aurea	WP_036258976	WP_051953267	WP_051953603		scaffold
	Nitrobacteraceae (Bradyrhizobiaceae)	Rhodopseudomonas palustris TIE-1	ACF02757	B3QHD1		ACF00901	Complete
		Rhodopseudomonas sp. SK50-23	QUS40875	QUS40882	QUS40017		Complete
		Rhodopseudomonas palustris HaA2	ABD06434	ABD06426	ABD06462	ABD07870	Complete
		Nitrobacter hamburgensis X14	ABE63461	ABE63468			Complete
		Nitrobacter winogradskyi Nb-255	ABA05523	ABA05530			Complete
		Tardiphaga robiniae	KZD22054	KZD21835	KZD22812	KZD22811	Complete
		Oligotropha carboxidovorans OM5	ACI93782	ACI93786			Complete
		Bradyrhizobium japonicum USDA 6	BAL12012	BAL12022	BAL11735		Complete
		Bradyrhizobium sp. 1(2017)	QIO35244	QIO35253	QIO35011	QIO37379	Complete
		Bradyrhizobium sp. 6(2017)	QIG98638	QIG98630	QIG98879	QIG98889	Complete
		Bradyrhizobium sp. BTAi1	ABQ33590	ABQ35087	ABQ35260		Complete
		Bradyrhizobium sp. CCBAU 051011	QHO79017	QHO75100	QHO78031	QHO78021	Complete
		Bradyrhizobium sp. CCBAU 51753	QOZ29722	QOZ24778	QOZ25019	QOZ29750	Complete
		Bradyrhizobium sp. CCBAU 51765	QOZ10915	QOZ13380	QOZ10632	QOZ10621	Complete
		Bradyrhizobium sp. CCBAU 53338	QOZ54195	QOZ54202	QOZ53981	QOZ53971	Complete
		Bradyrhizobium sp. CCBAU 53340	QOZ46665	QOZ46673	QOZ46390	QOZ46381	Complete
		Bradyrhizobium sp. CCBAU 53351	QOZ76009	QOZ76000	QOZ80393	QOZ80394	Complete
		Bradyrhizobium sp. CCBAU 53421	QOZ35528	QOZ35536	QOZ35273	QOZ38201	Complete
		Bradyrhizobium sp. CCGE-LA001	AMA57161	AMA61237	AMA57382	AMA61258	Complete
		Bradyrhizobium sp. KBS0725	QDW37647	QDW37639	QDW37926	QDW37916	Complete
		Bradyrhizobium sp. KBS0727	QDW44250	QDW44242	QDW44530	QDW44520	Complete
		Bradyrhizobium sp. LCT2	QHP71947	QHP71956	QHP71688	QHP71677	Complete
		Bradyrhizobium sp. ORS 278	CAL79893	CAL76441	CAL78618		Complete
		Bradyrhizobium sp. ORS 285	CCD87730	CCD88509	CCD85300		Complete
		Bradyrhizobium sp. S2-11-2	QWG20073	QWG20065	QWG16157		Complete
		Bradyrhizobium sp. S2-11-4	QWG26049	QWG21916			Complete
		Bradyrhizobium sp. S2-20-1	QWG15858	QWG11749			Complete
		Bradyrhizobium sp. SG09	BBO04934	BBO04925	BBO05205	BBO05216	Complete
		Bradyrhizobium sp. SK17	AUC95967	AUC95959	AUC96201	AUC96211	Complete
		Bradyrhizobium sp. TM102	BBO13922	BBO13931	BBO13655	BBO13644	Complete
		Bradyrhizobium diazoefficiens USDA 110	AND88455	AND88445	AND88694	AND88705	Complete
		Bradyrhizobium oligotrophicum	BAM92396	BAM90975	BAM88790		Complete
		Bradyrhizobium genosp. B	QPF89637	QPF89644	QPF89417	QPF89407	Complete
		Bradyrhizobium genosp. L	QPF86915	QPF86908	QPF87244	QPF88101	Complete
		Bradyrhizobium cosmicum	QDP24976	QDP24968	QDP25212	QDP25222	Complete
		Bradyrhizobium symbiodeficiens	QIP04893	QIP04901	QIP10658	QIP10648	Complete
		Bradyrhizobium amphicarpaeae	AWM00243	AWM00234	AWM04619	AWM00479	Complete
		Bradyrhizobium guangzhouense	QAU48125	QAU48132	QAU47903	QAU47894	Complete
		Bradyrhizobium zhanjiangense	RXG96836	RXG96828	RXG94718	RXG94707	Complete
		Bradyrhizobium betae	QFI71788	QFI71795	QFI71570	QFI71560	Complete
		Bradyrhizobium guangxiense	WP_128924600	WP_128924591	WP_128924872	WP_128924883	Complete
		Bradyrhizobium vignae	RXH03675	RXH03683	RXH01285	RXH01274	Complete
		Bradyrhizobium guangdongense	QAU42922	QAU40749	QAU40536	QAU40526	Complete
		Bradyrhizobium arachidis	QOZ67727	QOZ67717	QOZ67961	QOZ67971	Complete
		Bradyrhizobium ottawaense	AWL97367	AWL97378	AWL98496	AWL97123	Complete
		Bradyrhizobium paxllaeri	WP_065753747	WP_065753715	WP_065754151	WP_065754140	Complete
		Bradyrhizobium icense	ANW03466	ANW03475	ANW03265	ANW03254	Complete
		Afipia broomeae ATCC 49717	EKS41949	EKS41943	EKS38035		Scaffold
		Bradyrhizobium sp. CCBAU 21365	QOZ16314	ND	-	-	Complete
		Bradyrhizobium sp. PSBB068	QRI71746	ND	-	-	Complete
		Bradyrhizobium elkanii USDA 61	BBC01583	ND	-	-	Complete
		Variibacter gotjawalensis	NIK49935	ND	-	-	Complete
	Hyphomicrobiaceae	Rhodoplanes sp. Z2-YC6860	AMN40771	AMN38751	AMN43910	AMN43898	Complete
		Hyphomicrobium facile	SFV35278	SFV37105		SFV37111	contig
		Hyphomicrobium sp. MC1	CCB66981	ND	-	-	Complete
		Hyphomicrobium denitrificans ATCC 51888	ADJ22298	ND	-	-	Complete
		Rhodomicrobium vannielii ATCC 17100	ADP72221	ND	-	-	Complete
		Methyloceanibacter sp. Wino2	ND (OSC present)	ND	-	-	Complete
		Methyloceanibacter caenitepidi	ND (OSC present)	ND	-	-	Complete
		Hyphomicrobium nitrativorans	ND	ND	-	-	Complete
		Caenibius tardaugens NBRC 16725	ND	ND	-	-	Complete
		Candidatus Filomicrobium marinum	ND	ND	-	-	Complete
	Methylobacteriaceae	Methylorubrum extorquens DSM 13060	EHP90351	EHP94134		EHP80862	Complete
		Methylobacterium aquaticum	BAQ47951	BAQ47508			Complete
		Methylorubrum zatmanii	MBD8907526	MBD8907915	ARO55252	ARO57004	Complete
		Methylobacterium indicum	KMO15551	KMO13719			Complete
		Methylobacterium terrae	AWN49201	AWN48188			Complete
		Methylobacterium durans	AWN44660	AWN44136	AWN41506	AWN43428	Complete
		Methylobacterium radiodurans	AWN38525	AWN38132	AWN37884	AWN37328	Complete
		Methylobacterium radiotolerans JCM 2831	ACB27373	ACB25817	ACB25098	ACB23533	Complete
		Methylobacterium oryzae	AIQ91330	AIQ92141	AIQ91251	UIN32541	Complete
		Methylobacterium mesophilicum SR1.6/6	QGY04696	QGY04901	QGY06203	QGY00777	Complete
		Methylobacterium sp. WL1	QEE42306	TXN63336	TXM76740	TXN49265	Complete
		Methylobacterium sp. NI91	QIJ80912	QIJ81524	QIJ79170	QIJ80813	Complete
		Methylobacterium sp. CLZ	QIJ76010	QIJ76622	QIJ74264	QIJ75911	Complete
		Methylobacterium sp. AMS5	AMB45041	AMB47225	AMB44571	AMB46555	Complete
		Methylobacterium sp. 17Sr1-1	AWN55874	AWN54010			Complete
		Methylobacterium nodulans ORS 2060	ACL61886	ACL56886			Complete
		Enterovirga rhinocerotis	TDR94480	TDR94945			contig
		Methylobacterium phyllosphaerae	APT34852	ND	-	-	Complete
		Methylobacterium sp. DM1	AWI88697	ND	-	-	Complete
		Methylobacterium sp. XJLW	AWV14818	ND	-	-	Complete
		Microvirga ossetica	ND	ND	-	-	Complete
		Microvirga thermotolerans	ND	ND	-	-	Complete
		Microvirga sp. VF16	ND	ND	-	-	Complete
		Microvirga sp. 17 mud 1-3	ND	ND	-	-	Complete
		Methylobacterium sp. C1	ND	ND	-	-	Complete
	Methylocystaceae	Methylocystis sp. ATCC 49242	WP_036285863	WP_084679110	WP_036283510		Scaffold
	Rhizobiaceae	Rhizobium tropici	PRX87463	PRX87471	RAX42316	RAX38102	Scaffold
		Kaistia sp. SCN 65-12	ND	ODT13692	ODT32742		Scaffold
	Rhodobiaceae	Rhodoligotrophos sp. Lm1	WP_137391248	WP_137388381		WP_137390906	contig

## Sheet: Table S4
Taxonomic distribution of SC and HpnP in Cyanobacteria
		Number of complete genomes	Complete genome only		Draft genome included
Order	Family (genome available)		SC	HpnP	SC	HpnP
Chroococcidiopsidales	Chroococcidiopsidaceae	1	0	0	N	N
Gloeobacterales	Gloeobacteraceae	3	3	2	Y	Y		Y	Present in draft and/or complete genomes (at least one species)
Gloeoemargaritales	Gloeomargaritaceae	0	0	0	Y	Y		Y	Present only in draft genomes (at least one species)
Nostocales	Aphanizomenonaceae	5	3	0	Y	Y		N	Absent even in complete/draft genomes
	Calotrichaceae	8	6	2	Y	Y
	Chlorogloeopsidaceae	1	1	1	Y	Y
	Fortieaceae	0	0	0	Y	Y
	Hapalosiphonaceae	1	1	0	Y	Y
	Nostocaceae	27	24	13	Y	Y
	Rivulariaceae	1	0	0	Y	Y
	Scytonemataceae	0	0	0	Y	Y
	Symphyonemataceae	0	0	0	Y	Y
	Tolypothrichaceae	1	1	0	Y	Y
Chroococcales	Aphanothecaceae	4	3	2	Y	Y
	Chroococcaceae	4	2	0	Y	Y
	Cyanobacteriaceae	3	1	1	Y	Y
	Entophysalidaceae	0	0	0	N	Y
	Microcystaceae	4	4	0	Y	N
Oscillatoriales	Coleofasciculaceae	1	0	0	Y	Y
	Cyanothecaceae	0	0	0	Y	Y
	Desertifilaceae	0	0	0	Y	Y
	Gomontiellaceae	1	0	0	N	N
	Microcoleaceae	5	3	1	Y	Y
	Oscillatoriaceae	3	1	0	Y	Y
Pleurocapsales	Dermocarpellaceae	2	2	0	Y	N
	Hydrococcaceae	0	0	0	Y	N
	Hyellaceae	1	1	0	Y	N
	Xenococcaceae	0	0	0	N	N
Spirulinales	Spirulinaceae	0	0	0	N	N
Synechococcales	Acaryochloridaceae	2	2	0	Y	Y
	Chamaesiphonaceae	0	0	0	N	N
	Coelosphaeriaceae	0	0	0	N	N
	Leptolyngbyaceae	6	3	3	Y	Y
	Merismopediaceae	1	1	0	Y	Y
	Prochloraceae	13	0	0	N	N
	Prochlorotrichaceae	1	0	0	Y	Y
	Pseudanabaenaceae	2	0	0	Y	Y
	Synechococcaceae	70	8	7	Y	Y
Total	38	171	70	32	30	27
Ratio			0.409357	0.187135	0.789474	0.710526
HpnP/ SC				0.457143		0.9			HpnP/SC indicates the ratio of HpnP-bearing species among SC-bearing species.
			(Count of species)		(Count of family)				At the family level, HpnP/SC indicates the ratio of families that contain HpnP-bearing species among families that contain SC-bearing species.

## Sheet: Table S5
SC and HpnP distribution in Cyanobacteria				2-Methylhopanoid biosynthesis
Phylum	Order	Family	Species	SC	HpnP	Assembly level
Cyanobacteria (Oxyphotobacteria)	Chroococcidiopsidales	Chroococcidiopsidaceae	Chroococcidiopsis thermalis PCC 7203	ND	ND	Complete		ND: Not detected
	Gloeobacterales	Gloeobacteraceae	Gloeobacter violaceus PCC 7421	BAC91998	BAC90255	Complete
			Gloeobacter kilaueensis JS1	AGY58659	AGY59815	Complete		Species are retrieved mostly from NCBI and also from JGI for several species.
			Anthocerotibacter panamensis C109	WP_218081202	ND	Complete		https://www.ncbi.nlm.nih.gov/protein
	Gloeoemargaritales	Gloeomargaritaceae	Gloeomargarita lithophora Alchichica-D10	APB34375	APB33887	Chromosome		https://img.jgi.doe.gov/
			C42_A2020_066	MBF2097601	MBF2099020	Contig
	Nostocales	Aphanizomenonaceae	Anabaenopsis circularis NIES-21	BAY18756	BAY17779	Chromosome		Boldface & Green background: SC & HpnP present in a complete genome
			Aphanizomenon flos-aquae DEX188	QSV67408	ND	Complete		Boldface & Yellow background: SC & HpnP present in a draft genome
			Dolichospermum flos-aquae CCAP 1403/13F	QJB44070	ND	Complete
			Cylindrospermopsis curvispora	QNP29072	ND	Complete
			Cylindrospermopsis raciborskii N8	ND	ND	Complete
			Nodularia spumigena UHCC 0039	ND	ND	Complete
		Capsosiraceae	No genome
		Calotrichaceae	Calothrix sp. NIES-4101	BAZ42084	BAZ38251	Complete
			Calothrix sp. PCC 7716	BDA70843	BDA74930	Complete
			Calothrix sp. PCC 7507	AFY30807	ND	Complete
			Calothrix sp. PCC 6303	AFZ02674	ND	Complete
			Calothrix sp. NIES-4071	BAZ11305	ND	Complete
			Calothrix sp. NIES-2098	BAY07003	ND	Complete
			Calothrix sp. NIES-3974	ND	ND	Complete
			Calothrix sp. 336/3	ND	ND	Complete
		Chlorogloeopsidaceae	Chlorogloeopsis fritschii PCC 6912	RUR72374	RUR74466	Scaffold
		Dapisostemonaceae	No genome
		Fortieaceae	Aulosira sp. FACHB-615	2909923303	2909926281	Permanent Draft (JGI)
		Godleyaceae	No genome
		Gloeotrichiaceae	No genome
		Hapalosiphonaceae	Fischerella sp. PCC 9605	WP_026735136	WP_026735140	Scaffold
			Fischerella muscicola	PLZ86191	PLZ83382	Scaffold
			Fischerella sp. FACHB-380	MBD2432612	MBD2434437	Contig
			Fischerella thermalis CCMEE 5273	PMB03521	PMB11794	Scaffold
			Fischerella sp. NIES-3754	BAU06765	ND	Complete
		Nostocaceae	Nostoc punctiforme PCC 73102	ACC84529	ACC80996	Complete
			Nostoc sp. 'Lobaria pulmonaria (5183) cyanobiont'	AVH71263	AVH70704	Complete
			Nostoc sp. 'Peltigera membranacea cyanobiont' N6	AVH67297	AVH64609	Complete
			Nostoc sp. ATCC 53789	QHG16153	QHG18998	Complete
			Nostoc sp. C052	QLE42917	QLE40462	Complete
			Nostoc sp. C057	QLE48866	QLE51738	Complete
			Nostoc sp. HK-01	BBD62522	BBD57599	Complete
			Nostoc sp. PCC 7107	AFY41090	AFY42714	Complete
			Nostoc sp. TCL240-02	QKQ72847	QKQ76231	Complete
			Nostoc sp. TCL26-01	QLE55464	QLE59431	Complete
			Nostoc edaphicum CCNP1411	QMS87161	QMS89734	Complete
			Nostoc flagelliforme CCNUN1	AUB41232	AUB39230	Complete
			Nostoc sphaeroides CCNUC1	QFS44104	QFS49067	Complete
			Anabaena sp. FACHB-83	MBD2476020	MBD2479428	Contig
			Desmonostoc geniculatum HA4340-LM1	MBW4676460	MBW4674170	Contig
			Nostoc sp. CENA543	AUT01449	ND	Complete
			Nostoc sp. MS1	BCL35961	ND	Complete
			Nostoc sp. NIES-3756	BAT51405	ND	Complete
			Nostoc sp. PCC 7120 = FACHB-418	MBD2273283	ND	Complete
			Nostoc sp. PCC 7524	AFY48876	ND	Complete
			Nostoc sp. UHCC 0702	QSJ17331	ND	Complete
			Anabaena sp. 90	AFW95474	ND	Complete
			Anabaena sp. WA102	ALB41249	ND	Complete
			Trichormus variabilis ATCC 29413	ABA24268	ND	Complete
			Anabaena cylindrica PCC 7122	AFZ60533	ND	Complete
			Richelia sinica FACHB-800	QXE23512	ND	Complete
			Anabaena sp. YBS01	ND	ND	Complete
			Trichormus variabilis 0441	ND	ND	Complete
			Trichormus azollae	ND	ND	Complete
		Rivulariaceae	Rivularia sp. IAM M-261	GJD21410	GJD23579	Scaffold
			Rivularia sp. PCC 7116	ND	ND	Complete
		Scytonemataceae	Scytonema hofmannii PCC 7110	KYC41481	KYC41432	Scaffold
			Scytonema sp. NIES-4073	BAZ23934	BAZ24053	Chromosome
			Scytonema sp. RU_4_4	NJM74388	NJM70740	Contig
			Scytonema sp. HK-05	OKH55418	OKH58980	Scaffold
			Scytonema tolypothrichoides VB-61278	KAB8330371	KAB8335918	Scaffold
			Iningainema tapete BLCC-T55	MBD2770896	MBD2770750	Scaffold
			Brasilonema octagenarum UFV-OR1	NMF61294	NMF61628	Scaffold
			Brasilonema sennae CENA114	QDL09076	QDL11095	Chromosome
			Brasilonema bromeliae SPC951	NMG18208	NMG21256	Scaffold
			Brasilonema sp. CT11	MBP5976187	MBP5976314	Scaffold
			Brasilonema angustatum HA4187-MV1	MBW4596055	MBW4596456	Contig
		Stigonemataceae	No genome
		Symphyonemataceae	Mastigocladopsis repens	WP_026082593	WP_026082583	Scaffold
		Tolypothrichaceae	Tolypothrix campylonemoides VB511288	KAB8315101	KAB8315291	Scaffold
			Tolypothrix bouteillei VB521301	KAF3890364	KAF3890374	Scaffold
			Tolypothrix sp. NIES-4075	GAX43918	GAX41689	Scaffold
			Tolypothrix sp. Co-bin9	MBD0264376	MBD0261654	Contig
			Tolypothrix carrinoi HA7290-LM1	MBW4570826	MBW4570518	Contig
			Tolypothrix brevis GSE-NOS-MK-07-07A	MBW4476696	MBW4477078	Contig
			Hassallia byssoidea VB512170	KIF33410	KIF33251	Scaffold
			Hassallia sp. WJT32-NPBG1	MBW4611215	MBW4607685	Contig
			Spirirestis rafaelensis WJT71-NPBG6	MBW4448671	MBW4446857	Contig
			Tolypothrix sp. PCC 7910	QIR36621	ND	Complete
	Chroococcales	Aphanothecaceae	Gloeothece verrucosa PCC 7822 (Cyanothece sp. PCC 7822)	ADN12174	ADN15936	Complete
			Gloeothece citriformis PCC 7424	ACK71719	ACK71562	Complete
			Halothece sp. SG1_48_229	2795624261	2795623811	Permanent Draft (JGI)
			Aphanothece hegewaldii CCALA 016	PSF35034	PSF31301	Contig
			Candidatus Atelocyanobacterium thalassa isolate ALOHA	ADB95598	ND	Complete
			Halothece sp. PCC 7418	ND	ND	Complete
			Rippkaea orientalis	ND	ND	Complete
			Crocosphaera subtropica	ND	ND	Complete
			Euhalothece natronophila	ND	ND	Complete
		Chroococcaceae	Geminocystis herdmanii	WP_017294326	WP_017295972	Chromosome
			Gloeocapsa sp. DLM2.Bin57	TVQ42663	TVQ46869	Contig
			Gloeocapsa sp. PCC 73106	ELS00147	ELS00063	Contig
			Chroococcus sp. FPU101	GFE71393	GFE67547	Contig
			Geminocystis sp. M7585_C2015_104	HIK38121	HIK36537	Contig
			Geminocystis sp. NIES-3709	BAQ64894	ND	Complete
			Geminocystis sp. NIES-3708	BAQ59825	ND	Complete
			Chondrocystis	ND	ND	Complete
			Gloeocapsa sp. PCC 7428	ND	ND	Complete
		Cyanobacteriaceae	Cyanobacterium aponinum PCC 10605	AFZ53755	AFZ54274	Complete
			Cyanobacterium stanieri PCC 7202	ND	ND	Complete
			Cyanobacterium sp. HL-69	ND	ND	Complete
		Cyanothrichaceae	No genome
		Entophysalidaceae	Chlorogloea purpurea SAG 13.99	ND	MBR8829712	Contig
		Gomphosphaeriaceae	No genome
		Microcystaceae	Microcystis aeruginosa FD4	QGZ92467	ND	Complete
			Microcystis sp. MC19	AVQ70508	ND	Complete
			Microcystis panniformis FACHB-1757	AKV67589	ND	Complete
			Microcystis viridis NIES-102	BBH39367	ND	Complete
	Oscillatoriales	Borziaceae	No genome
		Coleofasciculaceae	Coleofasciculus sp. Co-bin14	MBD0347009 (short)	MBD0343778	Contig
			Geitlerinema sp. PCC 7407	ND	ND	Complete
		Cyanothecaceae	Cyanothece sp. PCC 7425	ACL45896	ACL44263	-
		Desertifilaceae	Desertifilum sp. IPPAS B-1220	OEJ73317	OEJ75767	Contig
			Desertifilum sp. SIO1I2	NES94363	NES97259	Scaffold
		Gomontiellaceae	Crinalium epipsammum PCC 9333	ND	ND	Complete
		Homoeotrichaceae	No genome
		Microcoleaceae	Microcoleus sp. PCC 7113	AFZ21552	AFZ21566	Complete
			Symploca sp. SIO2C1	NEP11559	NEP12096	Scaffold
			Symploca sp. SIO1C2	NER19198	NER24529	Scaffold
			Kamptonema sp. SIO1D9	NET89643	NET88677	Scaffold
			Planktothrix sp. FACHB-1375	MBD2185110	MBD2183846	Contig
			Trichodesmium erythraeum IMS101	ABG50159	ND	Complete
			Planktothrix agardhii NIES-204	BBD55650	ND	Complete
			Arthrospira sp. PCC 9108	ND	ND	Complete
			Oxynema aestuarii	ND	ND	Complete
		Oscillatoriaceae	Phormidium ambiguum IAM M-71	OKH30712	OKH30721	Scaffold
			Phormidium sp. CLA17	MBM0742079	MBM0743900	Scaffold
			Phormidium sp. FACHB-592	MBD2074161	MBD2072798	Contig
			Oscillatoria sp. FACHB-1406	MBD2579182	MBD2577928	Contig
			Moorea producens PAL-8-15-08-1	AOX02214	ND	Complete
			Oscillatoria nigro-viridis	ND	ND	Complete
			Oscillatoria acuminata	ND	ND	Complete
	Pleurocapsales	Dermocarpellaceae	Stanieria cyanosphaera PCC 7437	AFZ37418	ND	Complete
			Stanieria sp. NIES-3757	BAU63716	ND	Complete
		Hydrococcaceae	Hydrococcus rivularis NIES-593	OKH25988	ND	Scaffold
		Hyellaceae	Pleurocapsa sp. PCC 7327 (Pleurocapsa minor)	AFY77995	ND	Complete
		Xenococcaceae	Xenococcus sp. PCC 7305	ND	ND	Contig
	Spirulinales	Spirulinaceae	Spirulina major	ND	ND	Scaffold
			Spirulina subsalsa IAM M-223	ND	ND	Scaffold
			Spirulinaceae cyanobacterium SM2_1_0	ND	NJL02874	Scaffold
	Synechococcales	Acaryochloridaceae	Acaryochloris sp. RCC1774 (Acaryochloris thomasi)	PZD74479	PZD72949	Scaffold
			Acaryochloris marina S15	QUY43950	ND	Complete
			Acaryochloris marina MBIC11017	ABW29816	ND	Complete
		Chamaesiphonaceae	Chamaesiphon minutus PCC 6605	ND	ND	Chromosome
		Coelosphaeriaceae	Snowella sp.	ND	ND	Scaffold
		Heteroleibleiniaceae	No genome
		Leptolyngbyaceae	Leptolyngbya sp. NIES-3755	BAU09534	BAU11494	Complete
			Leptolyngbya boryana NIES-2135	BAY54469	BAY53888	Complete
			Leptolyngbya sp. PKUAC-SCTE412	QZZ23328	QZZ19945	Complete
			Leptolyngbya sp. NIES-2104	GAP96065	GAP98132	Contig
			Stenomitos frigidus ULC18	PSB24273	PSB30765	Scaffold
			Neosynechococcus sphagnicola sy1 (CAUP A 1101)	KGF72746	KGF73531	Contig
			Myxacorys almedinensis A	NDJ16304	NDJ19944	Scaffold
			Myxacorys chilensis ATA2-1-KO14	MBW4537660	MBW4539373	Contig
			Stenomitos rutilans HA7619-LM2	MBW4468936	MBW4474662	Contig
			Leptolyngbya sp. BL0902	ND	ND	Complete
			Leptolyngbya sp. O-77	ND	ND	Complete
			Leptolyngbya sp. PCC 7376	ND	ND	Complete
		Merismopediaceae	Aphanocapsa montana BDHKU210001	NHC56866	NHC58238	Scaffold
			Aphanocapsa lilacina HA4352-LM1	MBW4698582	MBW4697588	Contig
			Synechocystis sp. PCC 6803 substr. PCC-N	BAL32318	ND	Complete
		Prochloraceae (Prochlorophytes)	Prochlorococcus marinus str. MIT 9313	ND	ND	Complete
			Prochlorococcus sp. MIT 0604	ND	ND	Complete
			Prochlorococcus sp. MIT 0801	ND	ND	Complete
			Prochlorococcus marinus str. AS9601	ND	ND	Complete
			Prochlorococcus marinus str. MIT 9215	ND	ND	Complete
			Prochlorococcus marinus str. MIT 9301	ND	ND	Complete
			Prochlorococcus marinus str. MIT 9303	ND	ND	Complete
			Prochlorococcus marinus str. MIT 9312	ND	ND	Complete
			Prochlorococcus marinus str. MIT 9515	ND	ND	Complete
			Prochlorococcus marinus str. NATL1A	ND	ND	Complete
			Prochlorococcus marinus str. NATL2A	ND	ND	Complete
			Prochlorococcus marinus subsp. marinus str. CCMP1375	ND	ND	Complete
			Prochlorococcus marinus subsp. pastoris str. CCMP1986	ND	ND	Complete
		Prochlorotrichaceae	Prochlorothrix hollandica PCC 9006	KKI99536	KKJ00543	Scaffold
			Halomicronema hongdechloris	ND	ND	Complete
		Pseudanabaenaceae	LEGE 13415	MBE9011546	MBE9011789 (short) MBE9012794 (short)	Contig
			Pseudanabaena sp. PCC 7367	ND	ND	Complete
			Pseudanabaena sp. ABRG5-3	ND	ND	Complete
		Romeriaceae	No genome
		Schizotrichaceae	No genome
		Synechococcaceae	Synechococcus sp. PCC 6312	AFY60629	AFY60158	Complete
			Synechococcus lividus PCC 6715	ATS19431	ATS19577	Complete
			Thermosynechococcus elongatus BP-1	BAC09861	BAC08321	Complete
			Thermosynechococcus elongatus PKUAC-SCTE542	QLL29245	QLL29833	Complete
			Thermosynechococcus vulcanus	BAY52692	BAY52138	Complete
			Thermosynechococcus sp. CL-1	QEQ00795	QEQ00299	Complete
			Thermosynechococcus sp. TA-1	QSF48491	QSF50136	Complete
			Synechococcus sp. PCC 7502	AFY75324	ND	Complete
			Synechococcus sp. JA-2-3B'a(2-13)	ND	ND	Complete
			Synechococcus sp. JA-3-3Ab	ND	ND	Complete
			Synechococcus elongatus PCC 6301	ND	ND	Complete
			Synechococcus elongatus UTEX 3055	ND	ND	Complete
			Cyanobium sp. M30B3	ND	ND	Complete
			Cyanobium sp. NIES-981	ND	ND	Complete
			Cyanobium sp. NS01	ND	ND	Complete
			Cyanobium gracile	ND	ND	Complete
			Synechococcus sp. A15-127	ND	ND	Complete
			Synechococcus sp. A15-24	ND	ND	Complete
			Synechococcus sp. A15-28	ND	ND	Complete
			Synechococcus sp. A15-44	ND	ND	Complete
			Synechococcus sp. A15-60	ND	ND	Complete
			Synechococcus sp. A15-62	ND	ND	Complete
			Synechococcus sp. A18-25c	ND	ND	Complete
			Synechococcus sp. A18-40	ND	ND	Complete
			Synechococcus sp. A18-46.1	ND	ND	Complete
			Synechococcus sp. BIOS-U3-1	ND	ND	Complete
			Synechococcus sp. BMK-MC-1	ND	ND	Complete
			Synechococcus sp. CB0101	ND	ND	Complete
			Synechococcus sp. CBW1002	ND	ND	Complete
			Synechococcus sp. CBW1004	ND	ND	Complete
			Synechococcus sp. CBW1006	ND	ND	Complete
			Synechococcus sp. CBW1107	ND	ND	Complete
			Synechococcus sp. CBW1108	ND	ND	Complete
			Synechococcus sp. CC9311	ND	ND	Complete
			Synechococcus sp. CC9902	ND	ND	Complete
			Synechococcus sp. KORDI-100	ND	ND	Complete
			Synechococcus sp. KORDI-49	ND	ND	Complete
			Synechococcus sp. KORDI-52	ND	ND	Complete
			Synechococcus sp. LTW-R	ND	ND	Complete
			Synechococcus sp. M16.1	ND	ND	Complete
			Synechococcus sp. MEDNS5	ND	ND	Complete
			Synechococcus sp. MIT S9220	ND	ND	Complete
			Synechococcus sp. MVIR-18-1	ND	ND	Complete
			Synechococcus sp. Minos11	ND	ND	Complete
			Synechococcus sp. NIES-970	ND	ND	Complete
			Synechococcus sp. NOUM97013	ND	ND	Complete
			Synechococcus sp. PCC 7002	ND	ND	Complete
			Synechococcus sp. PCC 7003	ND	ND	Complete
			Synechococcus sp. PCC 7117	ND	ND	Complete
			Synechococcus sp. PCC 73109	ND	ND	Complete
			Synechococcus sp. PCC 8807	ND	ND	Complete
			Synechococcus sp. PROS-7-1	ND	ND	Complete
			Synechococcus sp. PROS-9-1	ND	ND	Complete
			Synechococcus sp. PROS-U-1	ND	ND	Complete
			Synechococcus sp. RCC307	ND	ND	Complete
			Synechococcus sp. ROS8604	ND	ND	Complete
			Synechococcus sp. RS9902	ND	ND	Complete
			Synechococcus sp. RS9907	ND	ND	Complete
			Synechococcus sp. RS9909	ND	ND	Complete
			Synechococcus sp. RSCCF101	ND	ND	Complete
			Synechococcus sp. SYN20	ND	ND	Complete
			Synechococcus sp. SynAce01	ND	ND	Complete
			Synechococcus sp. TAK9802	ND	ND	Complete
			Synechococcus sp. UTEX 2973	ND	ND	Complete
			Synechococcus sp. WH 7803	ND	ND	Complete
			Synechococcus sp. WH 8101	ND	ND	Complete
			Synechococcus sp. WH 8102	ND	ND	Complete
			Synechococcus sp. WH 8103	ND	ND	Complete
			Synechococcus sp. WH 8109	ND	ND	Complete
			Dactylococcopsis salina	ND	ND	Complete

## Sheet: Table S6
Total hopane abundance and 2-MHI in the Barney Creek Formation drill cores
	depth (m)	sum C27-C35 hopanes (ng/g)	C31 2-MHI (%)
	45.4 interior	788.8	2
	47.6	746.9	2.7
	50.3	58.1	2.1
	67.1	385.7	1.4
	71.7	130.8	1.5
	83	31.4	2.2
	90.3	27.5	6.2
	101.6	5.8	4
	106.3	407.1	1.4
	162.9	368.3	1.6
	199.1	1058.4	1.8
	218.1	1531.6	11.2
	252.9	7.8	1.1
	328.8	17.8	11.5
	685.3 exterior	65.6	16.7
	interior	2.4	-
	869.6 exterior	13.8	13.2
	interior	n.d.	-

## Sheet: Table S7
Sample list for the 2-MHI record
Sample ID	Age, Ma	Country	Basin	Formation	Type	Drill core	C31 2aMHI		Avg C31 2aMHI	Age	n	Ref
															AVERAGES			BINS
Fall SS 0-10	0	USA	Sukok Seep		Extract		0.0245						Color code:		Age (Ma)	2aMHI%		Age (Ma)	2aMHI
Fall SS 10-20	0	USA	Sukok Seep		Extract		0.0105						Literature		0	0.0416658		0–100	3.2
Fall SS 20-30	0	USA	Sukok Seep		Extract		0.0063						This work		1	0.002		100–200	6.4
Fall SS 30-40	0	USA	Sukok Seep		Extract		0.0082								5	0.004		200–300	5.91
Fall SS 40-50	0	USA	Sukok Seep		Extract		0.009								14	0.015		300–400	8.08
Fall SS 50-60	0	USA	Sukok Seep		Extract		0.0066								34	0.004		400–500	4.37
Fall SS 60-70	0	USA	Sukok Seep		Extract		0.0094								40	0.0007		500–600	5.09
Fall SS 70-80	0	USA	Sukok Seep		Extract		0.0115								48	0.0374		600–800	1.44
Fall SS 80-90	0	USA	Sukok Seep		Extract		0.0252								50	0.0695		800–1200	0.69
Fall SS 90-109	0	USA	Sukok Seep		Extract		0.0114								66	0.0388376		1200–1600	0.73
Fall NW 0-13	0	USA	North Walakpa		Extract		0.1081								66	0.0342034		>1600	1.08
Fall NW 13-30	0	USA	North Walakpa		Extract		0.0831								76	0.00430833
Fall NW 30 -46	0	USA	North Walakpa		Extract		0.095								85	0.02
Fall IK 0-15	0	USA	Ikroavik		Extract		0.0698								94	0.1447
Fall IK 15-28	0	USA	Ikroavik		Extract		0.0728								112	0.00487583
Spring LQ3 1 - 4	0	USA	Lake Qalluraq		Extract		0.0962								115	0.0971724
Spring LQ3 6-10	0	USA	Lake Qalluraq		Extract		0.0896								120	0.115333
Spring LQ3 11-15	0	USA	Lake Qalluraq		Extract		0.0053								140	0.0466
Spring LQ3 60 - 64	0	USA	Lake Qalluraq		Extract		0.0042								150	0.188
Spring S3 0-4	0	USA	Sukok Center Site		Extract		0.0952								152	0.0235
Spring S3 4-12	0	USA	Sukok Center Site		Extract		0.0981								152	0.0346
Spring S3 12-28	0	USA	Sukok Center Site		Extract		0.1265								156	0.008
Spring S3 28-38	0	USA	Sukok Center Site		Extract		0.106								190	0.0579
Fall SS 0-10	0	USA	Sukok Seep		Hypy		0.0051								201	0.0476
Fall SS 10-20	0	USA	Sukok Seep		Hypy		0.0073								235	0.0321
Fall SS 20-30	0	USA	Sukok Seep		Hypy		0.0097								235	0.0372
Fall SS 30-40	0	USA	Sukok Seep		Hypy		0.0113								250	0.184098
Fall SS 40-50	0	USA	Sukok Seep		Hypy		0.0115								252	0.0275025
Fall SS 50-60	0	USA	Sukok Seep		Hypy		0.0033								270	0.0784135
Fall SS 60-70	0	USA	Sukok Seep		Hypy		0.0147								290	0.0209
Fall SS 70-80	0	USA	Sukok Seep		Hypy		0.0042								299	0.0864
Fall SS 80-90	0	USA	Sukok Seep		Hypy		0.0228								299	0.0157119
Fall SS 90-109	0	USA	Sukok Seep		Hypy		0.0141								330	0.0461858
Fall NW 0-13	0	USA	North Walakpa		Hypy		0.0615								359	0.0213257
Fall NW 13-30	0	USA	North Walakpa		Hypy		0.0578								359	0.0680179
Fall NW 30 -46	0	USA	North Walakpa		Hypy		0.045								359	0.0761439
Fall IK 0-15	0	USA	Ikroavik		Hypy		0.0528								370	0.13654
Fall IK 15-28	0	USA	Ikroavik		Hypy		0.0897		0.0416658	0	38	[1]			375	0.0024
															383	0.214656
	1				n=1		0.002		0.002	1	1	[2]			444	0.021
															454	0.007
	5.2				n=1		0.004		0.004	5	1	[2]			460	0.0282417
															460	0.0329255
	14				n=2		0.015		0.015	14	2	[2]			465	0.0691739
															465	0.05385
	33.5				n=1		0.004		0.004	34	1	[2]			478	0.0864444
															485	0.0354741
LvM-982	40	USA	Green River	Green River			0.000665914		0.000665914	40	1				485	0.0593961
															520	0.1026
GA151	47.8	Australia	Gippsland	Latrobe Gp		Fortescue 3 (Esso)	0.0334443								520	0.010555
GA148	47.8	Australia	Gippsland	Latrobe Gp		Cobia 2 (FIT4)	0.0413755		0.0374099	48	2				520	0.0127179
															520	0.0535853
1	50	China	Bohai	Shaheijie		L10	0.064								520	0.04585
2	50	China	Bohai	Shaheijie		L10	0.061								524	0.0700956
3	50	China	Bohai	Shaheijie		L10	0.056								540	0.0162093
4	50	China	Bohai	Shaheijie		L10	0.08								540	0.115333
5	50	China	Bohai	Shaheijie		L10	0.08								540	0.0913
6	50	China	Bohai	Shaheijie		L9-S1	0.05								540	0.00840628
7	50	China	Bohai	Shaheijie		L9-S1	0.043								549	0.0318222
8	50	China	Bohai	Shaheijie		L9-S1	0.06								550	0.0713957
9	50	China	Bohai	Shaheijie		L9-S1	0.076								550	0.0833235
10	50	China	Bohai	Shaheijie		L9-S1	0.08								555	0.0551374
11	50	China	Bohai	Shaheijie		L9-S1	0.084								560	0.0627
12	50	China	Bohai	Shaheijie		L9-S1	0.082								560	0.0219886
13	50	China	Bohai	Shaheijie		L9-S1	0.075								570	0.095
14	50	China	Bohai	Shaheijie		L9-S1	0.084								580	0.00666865
15	50	China	Bohai	Shaheijie		L9-S1	0.085								590	0.0131521
17	50	China	Bohai	Shaheijie		L358	0.052		0.0695	50	16	[3]			620	0.0542
															635	0.018
GA175	66	Australia	Gippsland	Latrobe Gp		Halibut A 11	0.0388376		0.0388376	66	1				659	0.00892503
															725	0.0120838
Scheafer-1	66	Mexico	Yacatan Penisula	Chicxulub Crater		MOO77A - IODP 364	0.025								730	0.00360357
Scheafer-2	66	Mexico	Yacatan Penisula	Chicxulub Crater		MOO77A - IODP 364	0.0265								742	0.00670436
Scheafer-3	66	Mexico	Yacatan Penisula	Chicxulub Crater		MOO77A - IODP 364	0.03								750	0.00779624
Scheafer-4	66	Mexico	Yacatan Penisula	Chicxulub Crater		MOO77A - IODP 364	0.0493								777	0.00378874
Scheafer-5	66	Mexico	Yacatan Penisula	Chicxulub Crater		MOO77A - IODP 364	0.0439								800	0.01158
Scheafer-6	66	Mexico	Yacatan Penisula	Chicxulub Crater		MOO77A - IODP 364	0.0471								1078	0.00416855
Scheafer-7	66	Mexico	Yacatan Penisula	Chicxulub Crater		MOO77A - IODP 364	0.042								1100	0.00482192
Scheafer-8	66	Mexico	Yacatan Penisula	Chicxulub Crater		MOO77A - IODP 364	0.0322								1392	0.00556133
Scheafer-9	66	Mexico	Yacatan Penisula	Chicxulub Crater		MOO77A - IODP 364	0.0351								1439	0.00895366
Scheafer-10	66	Mexico	Yacatan Penisula	Chicxulub Crater		MOO77A - IODP 364	0.04								1636	0.0129756
Scheafer-11	66	Mexico	Yacatan Penisula	Chicxulub Crater		MOO77A - IODP 364	0.03								1640	0.0068
Scheafer-12	66	Mexico	Yacatan Penisula	Chicxulub Crater		MOO77A - IODP 364	0.0305								1640	0.0144
Scheafer-13	66	Mexico	Yacatan Penisula	Chicxulub Crater		MOO77A - IODP 364	0.035								1641	0.00895244
Scheafer-14	66	Mexico	Yacatan Penisula	Chicxulub Crater		MOO77A - IODP 364	0.0365
Scheafer-15	66	Mexico	Yacatan Penisula	Chicxulub Crater		MOO77A - IODP 364	0.0355
Scheafer-16	66	Mexico	Yacatan Penisula	Chicxulub Crater		MOO77A - IODP 364	0.018
Scheafer-17	66	Mexico	Yacatan Penisula	Chicxulub Crater		MOO77A - IODP 364	0.0195
Scheafer-18	66	Mexico	Yacatan Penisula	Chicxulub Crater		MOO77A - IODP 364	0.0255
Scheafer-19	66	Mexico	Yacatan Penisula	Chicxulub Crater		MOO77A - IODP 364	0.0255
Scheafer-20	66	Mexico	Yacatan Penisula	Chicxulub Crater		MOO77A - IODP 364	0.03
Scheafer-21	66	Mexico	Yacatan Penisula	Chicxulub Crater		MOO77A - IODP 364	0.0417
Scheafer-22	66	Mexico	Yacatan Penisula	Chicxulub Crater		MOO77A - IODP 364	0.0371
Scheafer-23	66	Mexico	Yacatan Penisula	Chicxulub Crater		MOO77A - IODP 364	0.0303
Scheafer-24	66	Mexico	Yacatan Penisula	Chicxulub Crater		MOO77A - IODP 364	0.0305
Scheafer-25	66	Mexico	Yacatan Penisula	Chicxulub Crater		MOO77A - IODP 364	0.0307
Scheafer-26	66	Mexico	Yacatan Penisula	Chicxulub Crater		MOO77A - IODP 364	0.0395
Scheafer-27	66	Mexico	Yacatan Penisula	Chicxulub Crater		MOO77A - IODP 364	0.037
Scheafer-28	66	Mexico	Yacatan Penisula	Chicxulub Crater		MOO77A - IODP 364	0.0402
Scheafer-29	66	Mexico	Yacatan Penisula	Chicxulub Crater		MOO77A - IODP 364	0.0478		0.0342034	66	28	[4]
LvM-915	76	Croatia	Brac	Pucisca			0.00430833		0.00430833	112	1
	85				n=3		0.02		0.02	85	3	[2]
	93.7			OAE2	n=2		0.17
	93.7			OAE2	n=10		0.148
	93.7			OAE2	n=7		0.12
	94			OAE2	n=5		0.151
	94			OAE2	n=7		0.168
	94			OAE2	n=4		0.111		0.144667	94	35	[2]
													0–100 Ma	0.0320198
LvM-912	112	Italy	Livello Bonarelli	OAE-1b			0.00535529
LvM-914	112	North Atlantic		OAE-1b		ODP-1049C	0.00496386		0.00515957	112	2
Castro-1	115	Spain	Subbetic	Carbonero Section			0.031
Castro-2	115	Spain	Subbetic	Carbonero Section			0.132
Castro-3	115	Spain	Subbetic	Carbonero Section			0.055
Castro-4	115	Spain	Subbetic	Carbonero Section			0.018
Castro-5	115	Spain	Subbetic	Carbonero Section			0.118
Castro-6	115	Spain	Subbetic	Carbonero Section			0.088
Castro-7	115	Spain	Subbetic	Carbonero Section			0.1
Castro-8	115	Spain	Subbetic	Carbonero Section			0.088
Castro-9	115	Spain	Subbetic	Carbonero Section			0.08
Castro-10	115	Spain	Subbetic	Carbonero Section			0.143
Castro-11	115	Spain	Subbetic	Carbonero Section			0.182
Castro-12	115	Spain	Subbetic	Carbonero Section			0.102
Castro-13	115	Spain	Subbetic	Carbonero Section			0.112
Castro-14	115	Spain	Subbetic	Carbonero Section			0.153
Castro-15	115	Spain	Subbetic	Carbonero Section			0.08
Castro-16	115	Spain	Subbetic	Carbonero Section			0.041
Castro-17	115	Spain	Subbetic	Carbonero Section			0.039
Castro-18	115	Spain	Subbetic	Carbonero Section			0.108
Castro-19	115	Spain	Subbetic	Carbonero Section			0.099
Castro-20	115	Spain	Subbetic	Carbonero Section			0.16
Castro-21	115	Spain	Subbetic	Carbonero Section			0.151
Castro-22	115	Spain	Subbetic	Carbonero Section			0.244
Castro-23	115	Spain	Subbetic	Carbonero Section			0.109
Castro-24	115	Spain	Subbetic	Carbonero Section			0.101
Castro-25	115	Spain	Subbetic	Carbonero Section			0.16
Castro-26	115	Spain	Subbetic	Carbonero Section			0.022
Castro-27	115	Spain	Subbetic	Carbonero Section			0.027
Castro-28	115	Spain	Subbetic	Carbonero Section			0.05
Castro-29	115	Spain	Subbetic	Carbonero Section			0.025		0.0971724	115	29	[5]
	100			OAE1	n=1		0.009
	120			OAE1	n=24		0.185
	120			OAE1	n=20		0.152		0.115333	120	45	[2]
GA224	139.8	Australia	Northern Carnarvon	Birdrong Sandstone		Rough Range 1	0.0466468		0.0466468	140	1
	150				n=8		0.188		0.188	150	8	[2]
GA888	152.1	Australia	Bonaparte	Plover		Skua 9 ST1	0.0235048		0.0235048	152	1
GA89	152.1	Australia	Northern Carnarvon			Legendre 1	0.0346267		0.0346267	152	1
	156				n=3		0.008		0.008	156	3	[2]
45.48 m	190	USA	Newark	Towaco			0.1049
48.13 m	190	USA	Newark	Towaco			0.1032
48.86 m	190	USA	Newark	Towaco			0.0879
49.83 m	190	USA	Newark	Towaco			0.0383
50.08 m	190	USA	Newark	Towaco			0.0366
50.35 m	190	USA	Newark	Towaco			0.0258
50.84 m	190	USA	Newark	Towaco			0.0214
51.54 m	190	USA	Newark	Towaco			0.056
52.61 m	190	USA	Newark	Towaco			0.0663
98.04 m	190	USA	Newark	Towaco			0.039		0.05794	190	10	[6]
													100–200 Ma	0.0640426
GA19999642	201.3	Australia	Cooper/Eromanga			Bennet 1	0.0475821		0.0475821	201	1
GA10059	235	Australia					0.0321157		0.0321157	235	1
GA19999818	235	Australia	Northern Carnarvon	Angel		Mutineer 1B	0.0371961		0.0371961	235	1
Saito-1	250	China	Nanpanjiang	Qingyan			0.04
Saito-2	250	China	Nanpanjiang	Qingyan			0.035
Saito-3	250	China	Nanpanjiang	Qingyan			0.055
Saito-4	250	China	Nanpanjiang	Qingyan			0.04
Saito-5	250	China	Nanpanjiang	Qingyan			0.035
Saito-6	250	China	Nanpanjiang	An			0.035
Saito-7	250	China	Nanpanjiang	An			0.065
Saito-8	250	China	Nanpanjiang	An			0.053
Saito-9	250	China	Nanpanjiang	An			0.075
Saito-10	250	China	Nanpanjiang	An			0.088
Saito-11	250	China	Nanpanjiang	An			0.082
Saito-12	250	China	Nanpanjiang	An			0.33
Saito-13	250	China	Nanpanjiang	An			0.352
Saito-14	250	China	Nanpanjiang	An			0.345
Saito-15	250	China	Nanpanjiang	An			0.38
Saito-16	250	China	Nanpanjiang	An			0.35
Saito-17	250	China	Nanpanjiang	An			0.352
Saito-18	250	China	Nanpanjiang	An			0.255
Saito-19	250	China	Nanpanjiang	An			0.36
Saito-20	250	China	Nanpanjiang	An			0.337
Saito-21	250	China	Nanpanjiang	An			0.137
Saito-22	250	China	Nanpanjiang	An			0.183
Saito-23	250	China	Nanpanjiang	An			0.325
Saito-24	250	China	Nanpanjiang	An			0.235
Saito-25	250	China	Nanpanjiang	An			0.228
Saito-26	250	China	Nanpanjiang	An			0.228
Saito-27	250	China	Nanpanjiang	An			0.191
Saito-28	250	China	Nanpanjiang	An			0.295
Saito-29	250	China	Nanpanjiang	An			0.089
Saito-30	250	China	Nanpanjiang	An			0.146
Saito-31	250	China	Nanpanjiang	An			0.282
Saito-32	250	China	Nanpanjiang	An			0.2
Saito-33	250	China	Nanpanjiang	An			0.165
Saito-34	250	China	Nanpanjiang	An			0.165
Saito-35	250	China	Nanpanjiang	An			0.375
Saito-36	250	China	Nanpanjiang	An			0.2
Saito-37	250	China	Nanpanjiang	An			0.215
Saito-38	250	China	Nanpanjiang	Luoluo			0.262
Saito-39	250	China	Nanpanjiang	Luoluo			0.22
Saito-40	250	China	Nanpanjiang	Luoluo			0.359
Saito-41	250	China	Nanpanjiang	Luoluo			0.338
Saito-42	250	China	Nanpanjiang	Luoluo			0.262
Saito-43	250	China	Nanpanjiang	Luoluo			0.232
Saito-44	250	China	Nanpanjiang	Luoluo			0.23
Saito-45	250	China	Nanpanjiang	Luoluo			0.182
Saito-46	250	China	Nanpanjiang	Luoluo			0.137
Saito-47	250	China	Nanpanjiang	Luoluo			0.159
Saito-48	250	China	Nanpanjiang	Luoluo			0.38
Saito-49	250	China	Nanpanjiang	Luoluo			0.245
Saito-50	250	China	Nanpanjiang	Luoluo			0.269
Saito-51	250	China	Nanpanjiang	Luoluo			0.178
Saito-52	250	China	Nanpanjiang	Luoluo			0.214
Saito-53	250	China	Nanpanjiang	Luoluo			0.262
Saito-54	250	China	Nanpanjiang	Luoluo			0.205
Saito-55	250	China	Nanpanjiang	Luoluo			0.199
Saito-56	250	China	Nanpanjiang	Luoluo			0.164
Saito-57	250	China	Nanpanjiang	Luoluo			0.254
Saito-58	250	China	Nanpanjiang	Luoluo			0.213
Saito-59	250	China	Nanpanjiang	Luoluo			0.248
Saito-60	250	China	Nanpanjiang	Luoluo			0.172
Saito-61	250	China	Nanpanjiang	Luoluo			0.2
Saito-62	250	China	Nanpanjiang	Luoluo			0.081
Saito-63	250	China	Nanpanjiang	Luoluo			0.151
Saito-64	250	China	Nanpanjiang	Luoluo			0.117
Saito-65	250	China	Nanpanjiang	Luoluo			0.055
Saito-66	250	China	Nanpanjiang	Luoluo			0.212
Saito-67	250	China	Nanpanjiang	Luoluo			0.15
Saito-68	250	China	Nanpanjiang	Luoluo			0.061
Saito-69	250	China	Nanpanjiang	Luoluo			0.254
Saito-70	250	China	Nanpanjiang	Luoluo			0.214
Saito-71	250	China	Nanpanjiang	Luoluo			0.174
Saito-72	250	China	Nanpanjiang	Luoluo			0.157
Saito-73	250	China	Nanpanjiang	Luoluo			0.201
Saito-74	250	China	Nanpanjiang	Luoluo			0.161
Saito-75	250	China	Nanpanjiang	Luoluo			0.183
Saito-76	250	China	Nanpanjiang	Luoluo			0.137
Saito-77	250	China	Nanpanjiang	Luoluo			0.137
Saito-78	250	China	Nanpanjiang	Luoluo			0.255
Saito-79	250	China	Nanpanjiang	Luoluo			0.089
Saito-B-1	250	China	Nanpanjiang	Qingyan			0.051
Saito-B-2	250	China	Nanpanjiang	Qingyan			0.07
Saito-B-3	250	China	Nanpanjiang	Qingyan			0.07
Saito-B-4	250	China	Nanpanjiang	Qingyan			0.185
Saito-B-5	250	China	Nanpanjiang	Qingyan			0.085
Saito-B-6	250	China	Nanpanjiang	Qingyan			0.05
Saito-B-7	250	China	Nanpanjiang	Qingyan			0.108
Saito-B-8	250	China	Nanpanjiang	Qingyan			0.09
Saito-B-9	250	China	Nanpanjiang	Qingyan			0.1
Saito-B-10	250	China	Nanpanjiang	Qingyan			0.089
Saito-B-11	250	China	Nanpanjiang	Qingyan			0.11
Saito-B-12	250	China	Nanpanjiang	Qingyan			0.105
Saito-B-13	250	China	Nanpanjiang	Qingyan			0.098
Saito-B-14	250	China	Nanpanjiang	Qingyan			0.09
Saito-B-15	250	China	Nanpanjiang	Qingyan			0.125
Saito-B-16	250	China	Nanpanjiang	Qingyan			0.109
Saito-B-17	250	China	Nanpanjiang	Qingyan			0.132
Saito-B-18	250	China	Nanpanjiang	Qingyan			0.16
Saito-B-19	250	China	Nanpanjiang	Qingyan			0.103
Saito-B-20	250	China	Nanpanjiang	Qingyan			0.055
Saito-B-21	250	China	Nanpanjiang	Qingyan			0.194
Saito-B-22	250	China	Nanpanjiang	Qingyan			0.283
Saito-B-23	250	China	Nanpanjiang	Qingyan			0.138
Saito-B-24	250	China	Nanpanjiang	Qingyan			0.13
Saito-B-25	250	China	Nanpanjiang	Qingyan			0.102
Saito-B-26	250	China	Nanpanjiang	Qingyan			0.2
Saito-B-27	250	China	Nanpanjiang	Qingyan			0.22
Saito-B-28	250	China	Nanpanjiang	Qingyan			0.11
Saito-B-29	250	China	Nanpanjiang	Qingyan			0.132
Saito-B-30	250	China	Nanpanjiang	Qingyan			0.312
Saito-B-31	250	China	Nanpanjiang	An			0.25
Saito-B-32	250	China	Nanpanjiang	An			0.14
Saito-B-33	250	China	Nanpanjiang	An			0.102
Saito-B-34	250	China	Nanpanjiang	An			0.022
Saito-B-35	250	China	Nanpanjiang	An			0.053
Saito-B-36	250	China	Nanpanjiang	An			0.28
Saito-B-37	250	China	Nanpanjiang	An			0.275
Saito-B-38	250	China	Nanpanjiang	An			0.27
Saito-B-39	250	China	Nanpanjiang	An			0.159
Saito-B-40	250	China	Nanpanjiang	Luoluo			0.143
Saito-B-41	250	China	Nanpanjiang	Luoluo			0.248
Saito-B-42	250	China	Nanpanjiang	Luoluo			0.338
Saito-B-43	250	China	Nanpanjiang	Luoluo			0.392
Saito-B-44	250	China	Nanpanjiang	Luoluo			0.47		0.184098	250	123	[7]
GA409	251.9	Australia	Perth			Mount Horner 1	0.0275025		0.0275025	252	1
LvM-980	270	Germany	European Permian	Zechstein		Oil	0.077774
LvM-981	270	Germany	European Permian	Zechstein		Oil	0.0790531		0.0784135	270	2
Xia-1	290	China	Junggar Basin	Fengcheng			0.0098
Xia-2	290	China	Junggar Basin	Fengcheng			0.011
Xia-3	290	China	Junggar Basin	Fengcheng			0.016
Xia-4	290	China	Junggar Basin	Fengcheng			0.017
Xia-5	290	China	Junggar Basin	Fengcheng			0.015
Xia-6	290	China	Junggar Basin	Fengcheng			0.017
Xia-7	290	China	Junggar Basin	Fengcheng			0.016
Xia-8	290	China	Junggar Basin	Fengcheng			0.015
Xia-9	290	China	Junggar Basin	Fengcheng			0.018
Xia-10	290	China	Junggar Basin	Fengcheng			0.019
Xia-11	290	China	Junggar Basin	Fengcheng			0.021
Xia-12	290	China	Junggar Basin	Fengcheng			0.021
Xia-13	290	China	Junggar Basin	Fengcheng			0.022
Xia-14	290	China	Junggar Basin	Fengcheng			0.028
Xia-15	290	China	Junggar Basin	Fengcheng			0.025
Xia-16	290	China	Junggar Basin	Fengcheng			0.031
Xia-17	290	China	Junggar Basin	Fengcheng			0.032
Xia-18	290	China	Junggar Basin	Fengcheng			0.042		0.0208778	290	18	[8]
GA23 Aroms	298.9	Australia	Cooper/Eromanga	Patchawarra		Kanowana 1	0.0863545		0.0863545	299	1
17B007 - Early Permian	299	USA	Permian	Wolfcamp/Leonard		Greer 1	0.0157119		0.0157119	299	1
													200–300 Ma	0.0588724
LvM-890	330	Scotland	MidLand Valley	Petershill		Outcrop	0.0347742
LvM-891	330	Scotland	MidLand Valley	Petershill		Outcrop	0.0401658
LvM-893	330	Scotland	MidLand Valley	Petershill		Outcrop	0.0501124
LvM-894	330	Scotland	MidLand Valley	Petershill		Outcrop	0.0476927
LvM-896	330	Scotland	MidLand Valley	Petershill		Outcrop	0.0398318
LvM-897	330	Scotland	MidLand Valley	Petershill		Outcrop	0.0635588
LvM-898	330	Scotland	MidLand Valley	Petershill		Outcrop	0.0471647		0.0461858	330	7
GA2009019	358.9						0.0213257		0.0213257	359	1
GA20149682	358.9	Australia	Bonaparte	Milligans		Turtle 2	0.0680179		0.0680179	359	1
GA20149693	358.9	Australia	Canning	Grant		West Terrace 1	0.0761439		0.0761439	359	1
Slowakiewicz-1	370	England	Cleveland	Bowland-Hodder		Malton-4	0.1172
Slowakiewicz-2	370	England	Cleveland	Bowland-Hodder		Malton-4	0.1181
Slowakiewicz-3	370	England	Cleveland	Bowland-Hodder		Malton-4	0.1302
Slowakiewicz-4	370	England	Cleveland	Bowland-Hodder		Malton-4	0.1226
Slowakiewicz-5	370	England	Cleveland	Bowland-Hodder		Malton-4	0.1946		0.13654	370	5	[9]
Mud 47	375	Australia	Canning	Gogo		ED20	0.0012
Nodule 47	375	Australia	Canning	Gogo		ED21	0.003
Mud 54	375	Australia	Canning	Gogo		ED22	0.0039
Nodule 54	375	Australia	Canning	Gogo		ED23	0.0015		0.0024	375	4	[10]
GA19999118	382.7	Australia	Canning	Nullara Limestone		Blina 1	0.214656		0.214656	383	1
													300–400 Ma	0.0807527
17B014	444	Poland	Holy Cross Mountains			ZB-1	0.0209891		0.0209891	444	1
17B013	450						0.00962416
17B017 - Katian	453	Poland	Holy Cross Mountains			ZB-1	0.0045904
17B023 - Sandbian	458	Poland	Holy Cross Mountains			ZB-2	0.0066755		0.00696335	454	3
17B006 - Kukersite	460	Estonia	Kukrose region			Kohtla Mine	0.0282417		0.0282417	460	1
LvM-911	460	Ukraine	Pripyat			Van Maldegem	0.0329255		0.0329255	460	1
280.04	465		Canning	Goldwyyer		Solanum-1	0.078
284.5	465		Canning	Goldwyyer		Solanum-1	0.074
291.6	465		Canning	Goldwyyer		Solanum-1	0.103
296.4	465		Canning	Goldwyyer		Solanum-1	0.117
302.84	465		Canning	Goldwyyer		Solanum-1	0.088
304.73	465		Canning	Goldwyyer		Solanum-1	0.065
308.79	465		Canning	Goldwyyer		Solanum-1	0.059
310.3	465		Canning	Goldwyyer		Solanum-1	0.075
311	465		Canning	Goldwyyer		Solanum-1	0.072
313.4	465		Canning	Goldwyyer		Solanum-1	0.115
315.58	465		Canning	Goldwyyer		Solanum-1	0.035
316.2	465		Canning	Goldwyyer		Solanum-1	0.034
318.9	465		Canning	Goldwyyer		Solanum-1	0.055
466.59	465		Canning	Goldwyyer		Santalum-1	0.078
470.82	465		Canning	Goldwyyer		Santalum-1	0.059
474.6	465		Canning	Goldwyyer		Santalum-1	0.048
478.19	465		Canning	Goldwyyer		Santalum-1	0.055
485.3	465		Canning	Goldwyyer		Santalum-1	0.081
489.5	465		Canning	Goldwyyer		Santalum-1	0.067
873.86	465		Canning	Goldwyyer		Goldwyver-1	0.051
972.65	465		Canning	Goldwyyer		Goldwyver-1	0.07
975.66	465		Canning	Goldwyyer		Goldwyver-1	0.045
979.97	465		Canning	Goldwyyer		Goldwyver-1	0.067		0.0691739	465	23	[11]
PO-2.3	465	Norway	Oslobreen Group	Valhallfonna			0.068
PO-4.8	465	Norway	Oslobreen Group	Valhallfonna			0.074
PO-11.2	465	Norway	Oslobreen Group	Valhallfonna			0.053
PO-14.2	465	Norway	Oslobreen Group	Valhallfonna			0.024
PO-19.65	465	Norway	Oslobreen Group	Valhallfonna			0.058
PO-33	465	Norway	Oslobreen Group	Valhallfonna			0.055
PO-39	465	Norway	Oslobreen Group	Valhallfonna			0.053
PO-45.9	465	Norway	Oslobreen Group	Valhallfonna			0.05
PO-67	465	Norway	Oslobreen Group	Valhallfonna			0.053
PO-76.1	465	Norway	Oslobreen Group	Valhallfonna			0.053
PO-83.1	465	Norway	Oslobreen Group	Valhallfonna			0.038
PO-92.4	465	Norway	Oslobreen Group	Valhallfonna			0.055
PO-105.2	465	Norway	Oslobreen Group	Valhallfonna			0.043
PO-112.9	465	Norway	Oslobreen Group	Valhallfonna			0.042
PO-122.8	465	Norway	Oslobreen Group	Valhallfonna			0.046
PO-133.04	465	Norway	Oslobreen Group	Valhallfonna			0.078
PO-142	465	Norway	Oslobreen Group	Valhallfonna			0.073
PO-150.1	465	Norway	Oslobreen Group	Valhallfonna			0.088
PR-6	465	Norway	Oslobreen Group	Valhallfonna			0.04
PR-30.4	465	Norway	Oslobreen Group	Valhallfonna			0.033		0.05385	465	20	[12]
PS-3.6	478	Norway	Oslobreen Group	Kirtonryggen			0.107
PS-5.8	478	Norway	Oslobreen Group	Kirtonryggen			0.159
PS-38.2	478	Norway	Oslobreen Group	Kirtonryggen			0.055
PS-46.2	478	Norway	Oslobreen Group	Kirtonryggen			0.064
PS-48.8	478	Norway	Oslobreen Group	Kirtonryggen			0.038
PS-156.5	478	Norway	Oslobreen Group	Kirtonryggen			0.109
PS-184	478	Norway	Oslobreen Group	Kirtonryggen			0.116
PS-306	478	Norway	Oslobreen Group	Kirtonryggen			0.046
PS-389	478	Norway	Oslobreen Group	Kirtonryggen			0.084		0.0864444	478	9	[12]
TC_1	485	China	Tarim			TC_1	0.0266746
HD_1	485	China	Tarim			HD_1	0.0371309
YM_204	485	China	Tarim			YM_204	0.0426168		0.0354741	485	3
Dodonea-1	485	Australia	Canning			Dodonea-1	0.0593961		0.0593961	485	1
													400–500 Ma	0.0437176
Parfenova-1	520	Russia	Siberian Platform	Sinyaya			0.052
Parfenova-2	520	Russia	Siberian Platform	Sinyaya			0.058
Parfenova-3	520	Russia	Siberian Platform	Sinyaya			0.072
Parfenova-4	520	Russia	Siberian Platform	Sinyaya			0.077
Parfenova-5	520	Russia	Siberian Platform	Sinyaya			0.09
Parfenova-6	520	Russia	Siberian Platform	Sinyaya			0.093
Parfenova-7	520	Russia	Siberian Platform	Sinyaya			0.094
Parfenova-8	520	Russia	Siberian Platform	Sinyaya			0.067
Parfenova-9	520	Russia	Siberian Platform	Sinyaya			0.073
Parfenova-10	520	Russia	Siberian Platform	Sinyaya			0.079
Parfenova-11	520	Russia	Siberian Platform	Sinyaya			0.143
Parfenova-12	520	Russia	Siberian Platform	Sinyaya			0.076
Parfenova-13	520	Russia	Siberian Platform	Sinyaya			0.074
Parfenova-14	520	Russia	Siberian Platform	Sinyaya			0.079
Parfenova-15	520	Russia	Siberian Platform	Sinyaya			0.08
Parfenova-16	520	Russia	Siberian Platform	Sinyaya			0.1
Parfenova-17	520	Russia	Siberian Platform	Sinyaya			0.183
Parfenova-18	520	Russia	Siberian Platform	Sinyaya			0.134
Parfenova-19	520	Russia	Siberian Platform	Sinyaya			0.182
Parfenova-20	520	Russia	Siberian Platform	Sinyaya			0.246		0.1026	520	20	[13]
Georgina 20030382	520	Australia	Georgina	Arthur Creek			0.00689583
Georgina 20030381	520	Australia	Georgina	Arthur Creek			0.0142141		0.010555	520	2
B03002 10	520	Australia	Georgina	Currant bush limestone		Mount Isa-1	0.0120177
B03010 6i	520	Australia	Georgina	Currant bush limestone		Mount Isa-2	0.0134181		0.0127179	520	2
Georgina 20030386	520	Australia	Georgina	Thorntonia Limestone			0.0414654
15B602	520	Australia	Georgina	Thortonia Limestone		#11005	0.0530201
Georgina 20030384	520	Australia	Georgina	Thortonia Limestone			0.0662704		0.0535853	520	3
OMO001	520	Oman	South Oman Salt Basin	Q	Oil		0.0427
OMO012	520	Oman	South Oman Salt Basin	Q	Oil		0.0577
OMO018	520	Oman	South Oman Salt Basin	Q	Oil		0.0548
OMO019	520	Oman	South Oman Salt Basin	Q	Oil		0.0365
OMO020	520	Oman	South Oman Salt Basin	Q	Oil		0.033
OMO021	520	Oman	South Oman Salt Basin	Q	Oil		0.0504		0.04585	520	6	[14]
19C068	524	Australia	Eastern Officer	Observatory Hill	Source Rock Bitumen	Karlaya 1	0.072055
19C095	524	Australia	Eastern Officer	Observatory Hill	Source Rock Bitumen	Munta 1	0.0765389
19C096	524	Australia	Eastern Officer	Observatory Hill	Source Rock Bitumen	Munta 1	0.061693		0.0700956	524	3
19C069	540	Australia	Eastern Officer	Mena Mudstone	Source Rock Bitumen	Karlaya 1	0.00840079
19C078	540	Australia	Eastern Officer	Mena Mudstone	Source Rock Bitumen	Lairu 1	0.0195483
19C080	540	Australia	Eastern Officer	Mena Mudstone	Source Rock Bitumen	Lairu 1	0.020679		0.0162093	540	3
Thuleilat Shale.	540	Oman	South Oman Salt Basin	Ara A4		Marmul Northwest 7	0.07
Thuleilat Shale.	540	Oman	South Oman Salt Basin	Ara A4		Marmul Northwest 8	0.06
Thuleilat Shale.	540	Oman	South Oman Salt Basin	Ara A4		Marmul Northwest 9	0.09
Thuleilat Shale.	540	Oman	South Oman Salt Basin	Ara A4		Marmul Northwest 10	0.14
Athel silicilyte.	540	Oman	South Oman Salt Basin	Ara A4		Marmul Northwest 11	0.13
Athel silicilyte.	540	Oman	South Oman Salt Basin	Ara A4		Marmul Northwest 12	0.18
Athel silicilyte.	540	Oman	South Oman Salt Basin	Ara A4		Marmul Northwest 13	0.15
Athel silicilyte.	540	Oman	South Oman Salt Basin	Ara A4		Marmul Northwest 14	0.18
Athel silicilyte.	540	Oman	South Oman Salt Basin	Ara A4		Marmul Northwest 15	0.15
Athel silicilyte.	540	Oman	South Oman Salt Basin	Ara A4		Marmul Northwest 16	0.11
Athel silicilyte.	540	Oman	South Oman Salt Basin	Ara A4		Marmul Northwest 17	0.12
Athel silicilyte.	540	Oman	South Oman Salt Basin	Ara A4		Marmul Northwest 18	0.1
U‐Shale.	540	Oman	South Oman Salt Basin	Ara A4		Marmul Northwest 19	0.11
U‐Shale.	540	Oman	South Oman Salt Basin	Ara A4		Marmul Northwest 20	0.07
U‐Shale.	540	Oman	South Oman Salt Basin	Ara A4		Marmul Northwest 21	0.07		0.115333	540	15	[15]
	540			Ara total	AVERAGE		0.0913		0.0913	540	1	[16]
18B508 - Lontova Formation	540	Estonia		Lontova		Kunda Quarry	0.00840628		0.00840628	540	1
19C098	549	Australia	Eastern Officer	Narana	Source Rock Bitumen	Munta 1	0.0200916
19C108	549	Australia	Eastern Officer	Narana	Source Rock Bitumen	Ungoolya 1	0.0801569
19C109	549	Australia	Eastern Officer	Narana	Source Rock Bitumen	Ungoolya 1	0.0117894
19C111	549	Australia	Eastern Officer	Narana	Source Rock Bitumen	Ungoolya 1	0.015251		0.0318222	549	4
OMO005	550	Oman	South Oman Salt Basin	A1C	Oil		0.0674
OMO033	550	Oman	South Oman Salt Basin	A2C	Oil		0.0514
OMO034	550	Oman	South Oman Salt Basin	A2C	Oil		0.0485
OMO049	550	Oman	South Oman Salt Basin	A2C	Oil		0.0714
OMO053	550	Oman	South Oman Salt Basin	A2C	Oil		0.0566
OMO055	550	Oman	South Oman Salt Basin	A2C	Oil		0.0559
OMO056	550	Oman	South Oman Salt Basin	A2C	Oil		0.0518
OMO057	550	Oman	South Oman Salt Basin	A2C	Oil		0.0647
OMO031	550	Oman	South Oman Salt Basin	A3C	Oil		0.0741
OMO039	550	Oman	South Oman Salt Basin	A3C	Oil		0.0776
OMO041	550	Oman	South Oman Salt Basin	A3C	Oil		0.0763
OMO051	550	Oman	South Oman Salt Basin	A3C	Oil		0.0671
OMO052	550	Oman	South Oman Salt Basin	A3C	Oil		0.0562
OMO006	550	Oman	South Oman Salt Basin	A4C	Oil		0.0851
OMO016	550	Oman	South Oman Salt Basin	A4C	Oil		0.0812
OMO036	550	Oman	South Oman Salt Basin	A4C	Oil		0.0804
OMO038	550	Oman	South Oman Salt Basin	A4C	Oil		0.0806
OMO058	550	Oman	South Oman Salt Basin	A4C	Oil		0.1024
OMO045	550	Oman	South Oman Salt Basin	A4C+A3C	Oil		0.0729
OMO037	550	Oman	South Oman Salt Basin	A5C	Oil		0.0822
OMO043	550	Oman	South Oman Salt Basin	A5C	Oil		0.0809
OMO054	550	Oman	South Oman Salt Basin	A5C	Oil		0.0756
OMO035	550	Oman	South Oman Salt Basin	A6C	Oil		0.0818		0.0713957	550	23	[14]
OMO002	550	Oman	South Oman Salt Basin	PS Huqf	Oil		0.0815
OMO003	550	Oman	South Oman Salt Basin	PS Huqf	Oil		0.0494
OMO004	550	Oman	South Oman Salt Basin	PS Huqf	Oil		0.0704
OMO007	550	Oman	South Oman Salt Basin	PS Huqf	Oil		0.0739
OMO008	550	Oman	South Oman Salt Basin	PS Huqf	Oil		0.055
OMO009	550	Oman	South Oman Salt Basin	PS Huqf	Oil		0.1008
OMO010	550	Oman	South Oman Salt Basin	PS Huqf	Oil		0.0834
OMO011	550	Oman	South Oman Salt Basin	PS Huqf	Oil		0.0643
OMO013	550	Oman	South Oman Salt Basin	PS Huqf	Oil		0.1024
OMO014	550	Oman	South Oman Salt Basin	PS Huqf	Oil		0.1356
OMO017	550	Oman	South Oman Salt Basin	PS Huqf	Oil		0.0805
OMO022	550	Oman	South Oman Salt Basin	PS Huqf	Oil		0.0972
OMO023	550	Oman	South Oman Salt Basin	PS Huqf	Oil		0.0637
OMO024	550	Oman	South Oman Salt Basin	PS Huqf	Oil		0.0948
OMO026	550	Oman	South Oman Salt Basin	PS Huqf	Oil		0.1036
OMO027	550	Oman	South Oman Salt Basin	PS Huqf	Oil		0.0911
OMO028	550	Oman	South Oman Salt Basin	PS Huqf	Oil		0.0689		0.0833235	550	17	[14]
Siberia 4385	555	Russia					0.00781201
Siberia 320	555	Russia	Lena-Tunguska Province	Danilovskaya			0.0627918
Siberia 319	555	Russia	Lena-Tunguska Province	Danilovskaya			0.0742606
Siberia 321	555	Russia	Lena-Tunguska Province	Danilovskaya			0.0756853		0.0551374	555	4
	560			Buah	AVERAGE		0.0627		0.0627	560	1	[16]
20C058	560	Australia	Eastern Officer	Tanana	Source Rock Bitumen	Munta 1	0.0207462
20C063	560	Australia	Eastern Officer	Tanana	Source Rock Bitumen	Munta 1	0.0232311		0.0219886	560	2
	570			Shuram	AVERAGE		0.095		0.095	570	1	[16]
19C074	580	Australia	Western Officer	Dey Dey Mudstone	Source Rock Bitumen	Munta 1	0.00301594
Munta 1 - 1443	580	Australia	Western Officer	Dey Dey Mudstone		Munta 1	0.00606764
08G010 - 4044 - B	580	Australia	Western Officer				0.00835806
Munta 1 - 1810	580	Australia	Western Officer	Dey Dey Mudstone		Munta 1	0.00923295		0.00666865	580	4
20C037	590	Australia	Eastern Officer	Meramangye Fm	Source Rock Bitumen	Meramangye 1	0.0131521		0.0131521	590	1
													500–600	0.050939
	620	(635-613)		Masirah Bay Fm	AVERAGE		0.0542		0.0542	620	1	[16]
Araras LvM	635	Brazil	Alto Paraguai	Mirrasol d'Oeste Fm		Outcrop	0.018		0.018	635	1
13J005 = MG103	659	Australia	Amadeus	Aralka		BR05	0.00551834
13J0903	659	Australia	Amadeus	Aralka		BR05	0.0064277
13J0902 I	659	Australia	Amadeus	Aralka		BR05	0.00826995
12J019 i2	659	Australia	Amadeus	Aralka		BR05	0.0108043
11J005i	659	Australia	Amadeus	Aralka		BR05	0.0136048		0.00892503	659	5
14B214	725	Australia	Western Officer	Steptoe		Empress 1A	0.019562
14B213	725	Australia	Western Officer	Steptoe		Empress 1A	0.00460559		0.0120838	725	2
14B206 i	730	Australia	Western Officer	Kanpa		Empress 1A	0.00220677
14B212 i	730	Australia	Western Officer	Kanpa		Empress 1A	0.00233126
14B210	730	Australia	Western Officer	Kanpa		Empress 1A	0.00241584
14B204 i	730	Australia	Western Officer	Kanpa		Empress 1A	0.00322372
14B211	730	Australia	Western Officer	Kanpa		Empress 1A	0.00358745
14B203 i	730	Australia	Western Officer	Kanpa		Empress 1A	0.00785636		0.00360357	730	6
10J093	742	USA	Grand Canyon	Chuar, Walcott Member		outcrop	0.00241219
10J092	742	USA	Grand Canyon	Chuar, Walcott Member		outcrop	0.00260084
10J091	742	USA	Grand Canyon	Chuar, Walcott Member		outcrop	0.00404088
10J090	742	USA	Grand Canyon	Chuar, Walcott Member		outcrop	0.00524186
B04026-i	742	USA	Grand Canyon	Chuar, Walcott Member		outcrop	0.019226		0.00670436	742	5
VG-20-03-i	750	Sweden	Lake Vättern	Visingso Group		outcrop	0.00779624		0.00779624	750	1
14B202	777	Australia	Western Officer	Hussar		Empress 1A	0.00290126
14B201-a i	777	Australia	Western Officer	Hussar		Empress 1A	0.00467621		0.00378874	777	2
													600–800	0.0143877
11J006 = MG006	800	Australia	Amadeus	Johnnys Creek		BR05	0.00447229
13J718 aro repeat	800	Australia	Amadeus	Johnnys Creek		BR05	0.00592783
11J024 I	800	Australia	Amadeus	Johnnys Creek		BR05	0.00640647
11J021	800	Australia	Amadeus	Johnnys Creek		BR05	0.0118156
11J050	800	Australia	Amadeus	Johnnys Creek		BR05	0.0184664
11J038	800	Australia	Amadeus	Johnnys Creek		BR05	0.0223913		0.01158	800	6
13N36 = [51]	1078	USA	Keweenawan Rift	Nonesuch		PI-2	0.00335032
13N41 = [53]	1078	USA	Keweenawan Rift	Nonesuch		PI-2	0.0113969
13N31 = [38]	1078	USA	Keweenawan Rift	Nonesuch		D06	0.00328661
13N37 = [39]	1078	USA	Keweenawan Rift	Nonesuch		D06	0.00346792
B04007-I = [69]	1078	USA	Keweenawan Rift	Nonesuch		WPB-4	0.00358782
13N42 = [65]	1078	USA	Keweenawan Rift	Nonesuch		WPB-4	0.00419996
13N34 = [55]	1078	USA	Keweenawan Rift	Nonesuch		WPB-3	0.00314328
B04005-i = [59]	1078	USA	Keweenawan Rift	Nonesuch		WPB-3	0.00477902
13N45 = [60]	1078	USA	Keweenawan Rift	Nonesuch		WPB-3	0.00618536		0.00482192	1078	9
[13] = 12N20-I refractionated	1100	Mauritania	Taoudeni	Tourist		S2	0.0021831
[14] = 11N049-I	1100	Mauritania	Taoudeni	Tourist		S2	0.0028832
[6] = 11N048-I	1100	Mauritania	Taoudeni	Tourist		S2	0.00351367
[8] = 13N06-I	1100	Mauritania	Taoudeni	Tourist		S2	0.00449973
[17] = 11N050-I	1100	Mauritania	Taoudeni	Tourist		S2	0.00471278
[11] = 11N052-I	1100	Mauritania	Taoudeni	Tourist		S2	0.00537639
[20] = 11N054-I	1100	Mauritania	Taoudeni	En Nesoar		S2	0.00409667
[22] = 11N045b-I	1100	Mauritania	Taoudeni	En Nesoar		S2	0.00415286
[29] = 11N055-I	1100	Mauritania	Taoudeni	En Nesoar		S2	0.00439596
[33] = 11N056-I	1100	Mauritania	Taoudeni	En Nesoar		S2	0.00480059
[32] = 11N051-I	1100	Mauritania	Taoudeni	En Nesoar		S2	0.00523905		0.00416855	1100	11
													800–1200	0.00685682
14B316 = #3-14	1392	China	North China Craton	Xiamaling			0.00225088
14B311	1392	China	North China Craton	Xiamaling			0.00887178		0.00556133	1392	2
17B101	1439	China	North China Craton	Tieling		YJ2	0.00895366		0.00895366	1439	1
													1200–1600	0.00725749
19G016i	1636	Australia	McArthur	Lynott		LV09	0.0229088
19G017i	1636	Australia	McArthur	Lynott		LV09	0.0235337
18G015i	1636	Australia	McArthur	Lynott		LV09	0.00830529
19G018i	1636	Australia	McArthur	Lynott		LV09	0.022597
19G001i	1636	Australia	McArthur	Lynott		LV09	0.00481109
19G003i	1636	Australia	McArthur	Lynott		LV09	0.00328981
19G004i	1636	Australia	McArthur	Lynott		LV09	0.0085773
19G005i	1636	Australia	McArthur	Lynott		LV09	0.00978187		0.0129756	1636	8
19G006i	1640	Australia	McArthur	Reward		LV09	0.00843755
19G007i	1640	Australia	McArthur	Reward		LV09	0.00507928		0.00675842	1640	2
B03175	1640	Australia	McArthur	Barney Creek		GR7	0.015251
B03178	1640	Australia	McArthur	Barney Creek		GR7	0.0163307
B03162c	1640	Australia	McArthur	Barney Creek		GR7	0.0199215
18G001i	1640	Australia	McArthur	Barney Creek		LV09	0.0132833
18G002i	1640	Australia	McArthur	Barney Creek		LV09	0.00831145
18G003	1640	Australia	McArthur	Barney Creek		LV09	0.00877815
18G004i	1640	Australia	McArthur	Barney Creek		LV09	0.0108144
18G005i	1640	Australia	McArthur	Barney Creek		LV09	0.0172578
18G008i	1640	Australia	McArthur	Barney Creek		LV09	0.015083
17G002i	1640	Australia	McArthur	Barney Creek		LV09	0.0161352
19G008i	1640	Australia	McArthur	Barney Creek		LV09	0.0158981
19G009i	1640	Australia	McArthur	Barney Creek		LV09	0.0116082
18G009i	1640	Australia	McArthur	Barney Creek		LV09	0.0137388
19G010i	1640	Australia	McArthur	Barney Creek		LV09	0.0166465
17G007i	1640	Australia	McArthur	Barney Creek		LV09	0.0209638
19G011i	1640	Australia	McArthur	Barney Creek		LV09	0.0181709
17G008i	1640	Australia	McArthur	Barney Creek		LV09	0.0164404
17G009i	1640	Australia	McArthur	Barney Creek		LV09	0.0149174
17G010i	1640	Australia	McArthur	Barney Creek		LV09	0.0110314
12B119	1640	Australia	McArthur	Barney Creek		LV09	0.0184498
18G007i	1640	Australia	McArthur	Barney Creek		LV09	0.00971785
18G006i	1640	Australia	McArthur	Barney Creek		LV09	0.0127369
18G010i	1640	Australia	McArthur	Barney Creek		LV09	0.0162894
19G012i	1640	Australia	McArthur	Barney Creek		LV09	0.0133975
19G013i	1640	Australia	McArthur	Cooley member		LV09	0.0153403
18G016i	1640	Australia	McArthur	Cooley member		LV09	0.0139222
18G017i	1640	Australia	McArthur	Cooley member		LV09	0.0133919
18G018i	1640	Australia	McArthur	Cooley member		LV09	0.00842916		0.0143663	1640	28
18G019i	1641	Australia	McArthur	Teena		LV09	0.0059379
19G014i	1641	Australia	McArthur	Teena		LV09	0.0101325
18G020i	1641	Australia	McArthur	Teena		LV09	0.0080737
19G015i	1641	Australia	McArthur	Teena		LV09	0.0116656		0.00895244	1641	4
													>1600	0.0107632
